# Supplementary material
Source: publisher site journal article supplement (https://www.dovepress.com/get_supplementary_file.php?f=391905.docx)
Supplement: Supplementary file 1 [file get_supplementary_file.php]

**Supplementary material 1** Univariate COX regression analysis.

|  | HR (95% CI) | *P*-value |
| --- | --- | --- |
| Age | 1.006 (0.998-1.014) | 0.119 |
| Gender | 1.285 (1.130-1.462) | <0.001 |
| Smoke | 0.814 (0.713-0.929) | 0.002 |
| Drink | 0.795 (0.689-0.918) | 0.002 |
| SBP | 1.006 (1.000-1.013) | 0.051 |
| DBP | 1.000 (0.993-1.008) | 0.929 |
| Heart rate | 0.991 (0.985-0.998) | 0.006 |
| Education | 0.910 (0.807-1.025) | 0.121 |
| Marital status | 0.788 (0.656-0.945) | 0.010 |
| Height | 0.986 (0.979-0.994) | <0.001 |
| Weight | 0.998 (0.992-1.005) | 0.604 |
| WBC | 0.969 (0.934-1.005) | 0.092 |
| Platelets | 0.999 (0.998-1.000) | 0.040 |
| Bun | 1.006 (0.990-1.021) | 0.464 |
| Creatinine | 1.380 (0.938-2.031) | 0.102 |
| Total Cholesterol | 1.002 (1.001-1.004) | 0.007 |
| HDL-C | 1.001 (0.996-1.005) | 0.809 |
| LDL-C | 1.003 (1.001-1.005) | 0.004 |
| hs-CRP | 0.999 (0.945-1.056) | 0.972 |
| HbA1c | 1.232 (1.072-1.416) | 0.003 |
| Serum uric acid | 0.962 (0.910-1.016) | 0.164 |
| Hematocrit | 0.993 (0.983-1.003) | 0.176 |
| Hemoglobin | 0.961 (0.930-0.993) | 0.016 |
| Dyslipidemia | 1.225 (0.953-1.574) | 0.113 |
| DM-lowering drugs | 0.917 (0.692-1.217) | 0.549 |
| Chronic lung diseases | 1.126 (0.919-1.380) | 0.251 |
| Cardiovascular disease | 1.233 (0.995-1.527) | 0.056 |
| Kidney disease | 1.031 (0.801-1.326) | 0.814 |
| Lipid-lowering drugs | 1.225 (0.953-1.574) | 0.113 |
| TyG Index | 1.188 (1.059-1.333) | 0.003 |
